# Supplementary material
Source: PubMed Central journal article supplement (PMC8415093)
Supplement: NIHMS1729539-supplement-Supplemental_Material.pdf [file NIHMS1729539-supplement-Supplemental_Material.pdf]

SENSOR-BASED PHYSICAL ACTIVITY AND COGNITIVE AGING  
AZ BURZYNSKA et al.

**Supplementary Material I**

Studies Linking Sensor-Based Sedentary Behavior (SB), Light PA (LPA) and Moderate to Vigorous PA (MVPA) with Cognition in Cognitively Healthy Older Adults.

| Author, year          | Sample                                                                          | Sensor, placement, time of wear*       | PA measure                                                                                      | Cognitive measures                                                                                                                                                                                                                                                                                                              | Main findings                                                                                                                                                                                                                                                                              |
|-----------------------|---------------------------------------------------------------------------------|----------------------------------------|-------------------------------------------------------------------------------------------------|---------------------------------------------------------------------------------------------------------------------------------------------------------------------------------------------------------------------------------------------------------------------------------------------------------------------------------|--------------------------------------------------------------------------------------------------------------------------------------------------------------------------------------------------------------------------------------------------------------------------------------------|
| (Brown et al., 2012)  | N=217<br>Age=69.5±6.6 (60–89)<br>54% females                                    | Actigraph<br>Hip<br>7 days             | Peak counts (highest PA intensity recorded daily)<br>Total daily counts                         | MMSE (global cognition), attention (digit span, Stroop), processing speed (digit symbol), verbal memory (Logical memory I and II, CVLT-II, visuospatial ability (Rey Complex Figure Test), and vocabulary fluency (Controlled Oral Word Association Task)                                                                       | Peak counts: better performance on speed, visuospatial ability and verbal fluency, adjusted for age, sex, years of education, APOE e4 allele, BMI and self-reported cardiovascular disease                                                                                                 |
| (Hayes et al., 2015b) | N=31<br>Age 55–82<br>58% female<br><br>Study also included<br>N=29<br>Age=18-31 | ActiGraph, non-dominant hip<br>>4 days | Total daily steps<br><br>Post-hoc analyses included SB and step rate within LPA and MVPA epochs | Visual memory (Brief Visuospatial Memory Test-Revised, Faces subtest from the Wechsler Memory Scale-Third Edition), verbal memory (CVLT-II and Logical Memory subtest from the WMS-III), experimental face memory task, executive function (TMT, Verbal Fluency, Mental Arithmetic and Digit Span, Wisconsin Card Sorting Test) | Older adults: Greater step count related to better visual and face-name memory, adjusted for age, sex, education, depression, hypertension, accelerometer wear time (in minutes), and SB<br><br>Post-hoc analyses: SB was negatively related to memory, adjusting for the above covariates |

SENSOR-BASED PHYSICAL ACTIVITY AND COGNITIVE AGING  
AZ BURZYNSKA et al.

|                         |                                                             |                                   |                                                                         |                                                                                                                                                                                                                                                   |                                                                                                                                                                                                                                                                                                                                                               |
|-------------------------|-------------------------------------------------------------|-----------------------------------|-------------------------------------------------------------------------|---------------------------------------------------------------------------------------------------------------------------------------------------------------------------------------------------------------------------------------------------|---------------------------------------------------------------------------------------------------------------------------------------------------------------------------------------------------------------------------------------------------------------------------------------------------------------------------------------------------------------|
| (Wilbur et al., 2012)   | N=174<br>Age=50–84<br>74% female<br>All Latino              | ActiGraph<br>waist<br>3–7 days    | LPA<br>MVPA<br>Total counts                                             | Episodic memory (East Boston Memory Test), perceptual speed (Stroop Task, Numbers Comparison Test), and semantic memory (Category Fluency Test)                                                                                                   | LPA, MVPA and total counts were positively associated with semantic memory, controlled for demographics and chronic health problems                                                                                                                                                                                                                           |
| (Halloway et al., 2017) | N=59<br>Age=50–84<br>All Latino                             | Actigraph<br>waist<br>3–7 days    | 5-year change in:<br>LPA<br>MVPA<br>Total PA<br>LPA bouts<br>MVPA bouts | 5-year change in Episodic memory (East Boston Memory Test), perceptual speed (Stroop Task, Numbers Comparison Test), and semantic memory (Category Fluency Test)                                                                                  | Only decline in MVPA bouts was associated with decline in semantic memory, adjusted for baseline age, number of chronic health problems, depressive symptoms, acculturation scores and other demographic and health status variables (e.g., marital status, self-reported personal income level, education level, number of hardships, and self-rated health) |
| (Zhu et al., 2017)      | N=6452,<br>Age=69.7±8.5<br>55.3% female<br>30.5% black      | Actical™<br>right hip<br>4-7 days | SB<br>LPA<br>%MVPA                                                      | Incident cognitive impairment defined as a shift from 4> to <4 on Six-Item Screener score over 3 years. Executive function and memory: Letter fluency, animal fluency, word list learning, Montreal Cognitive Assessment (orientation and recall) | Higher MVPA% quartiles: lower risk of cognitive impairment, better maintenance in executive function and memory, adjusted for age, sex, race, region of residence, education, BMI, hypertension, smoking, and diabetes. No significance was found for LPA or sedentary time                                                                                   |
| (Stubbs et al., 2017)   | N=274 (n=65 with possible MCI)<br>Age=74.52<br>54.4% female | ActiGraph<br>waist<br>>5 days     | Total PA<br>Light PA<br>MVPA                                            | 22-month decline in cognitive ability measured with Ascertain Dementia 8-item Questionnaire (self-rated changes in memory, orientation, problem-solving abilities, and daily activities)                                                          | Higher LPA and MVPA: reduced cognitive decline, adjusted for baseline cognitive score, sex, age, educational attainment, marital status, income source, smoking, number of chronic diseases, depressive symptoms, activities of daily living, and wear time, and LPA or MVPA                                                                                  |

SENSOR-BASED PHYSICAL ACTIVITY AND COGNITIVE AGING  
AZ BURZYNSKA et al.

|                                     |                                                             |                                                                |                                                                                        |                                                                                                   |                                                                                                                                                                                                                                                                                              |
|-------------------------------------|-------------------------------------------------------------|----------------------------------------------------------------|----------------------------------------------------------------------------------------|---------------------------------------------------------------------------------------------------|----------------------------------------------------------------------------------------------------------------------------------------------------------------------------------------------------------------------------------------------------------------------------------------------|
| (Kerr et al., 2013)                 | N=217<br>Age=83<br>70% female                               | ActiGraph,<br>hip<br>>4days                                    | Low<br>intensity<br>LPA (LLPA)<br>high intensity<br>LPA (HLP<br>A)<br>MVPA             | TMT-A and B                                                                                       | HLP<br>A was associated with faster time to complete TMT-A adjusted for sex, age-, and education. MVPA was associated with faster time to complete TMT-B and TMT B–A, adjusted for age-, sex-, education, LLPA and HLP<br>A.                                                                 |
| (Johnson et al., 2016)              | N=188<br>Age= 64±7<br>53.7% female                          | ActiGraph<br>>5 days                                           | SB<br>LPA<br>MVPA                                                                      | TMT-A and B                                                                                       | Only LPA (but not SB or MVPA) were related to better TMT-B performance, adjusted for age, sex, level of education attained, waist-to-hip ratio, history of cigarette smoking, alcohol intake, and cognitive status, total wear time minutes, leg muscle strength                             |
| (Iso-Markku et al., 2018)           | N=726<br>Age=72.9<br>52% female<br>Twin study               | Traixal<br>Hookie<br>AM20<br>accelerometer<br>Waist<br>>4 days | SB<br>LPA<br>MVPA<br>Daily step count<br>Mean daily MET                                | Total cognitive score: combined TICS and telephone assessment for dementia                        | SB was negatively and LPA positively associated with cognition only in a fully adjusted (age, sex, wear time, education, BMI, living conditions) in-between family model (twins treated as individuals). The association attributed to genetic and environmental selection.                  |
| (Ku, Liu, Lo, Chen, & Stubbs, 2017) | N=274 (n=65 with possible MCI)<br>Age=74.52<br>54.4% female | ActiGraph<br>waist<br>>5 days                                  | SB (h/day) and SB level: high (11+ h/day), medium (7–10.99 h/day), and low (< 7 h/day) | Decline in cognitive ability measured with Ascertain Dementia 8-item Questionnaire over 22 months | Higher levels of SB were associated with an increased risk of lower cognitive ability at follow up adjusted for age, sex, education, baseline cognitive status, marital status, income source, smoking, number of comorbidities, depressive symptoms, wear time of accelerometer, MVPA, ADLs |

\*Instructed wear time or minimum days required for analyses (if specified in the original work). TMT: Trial Making Test. ADL: activities of daily living. MCI: mild cognitive impairment.

**Supplementary Material II**

Bivariate 2-Tailed Correlations Between Accelerometer Wear Time, PA and Cognition

|                                                 | Number of days of Actigraph measurement |       |
|-------------------------------------------------|-----------------------------------------|-------|
| Number of days of Actigraph measurement         | Pearson Correlation                     | 1     |
|                                                 | Sig. (2-tailed)                         |       |
|                                                 | N                                       | 228   |
| Vocabulary (mean of winsorized z-scores)        | Pearson Correlation                     | -.048 |
|                                                 | Sig. (2-tailed)                         | .475  |
|                                                 | N                                       | 228   |
| Reasoning (mean of winsorized z-scores)         | Pearson Correlation                     | -.040 |
|                                                 | Sig. (2-tailed)                         | .546  |
|                                                 | N                                       | 228   |
| Perceptual speed (mean of winsorized z-scores)  | Pearson Correlation                     | -.084 |
|                                                 | Sig. (2-tailed)                         | .205  |
|                                                 | N                                       | 228   |
| Memory (mean of z-scores)                       | Pearson Correlation                     | -.005 |
|                                                 | Sig. (2-tailed)                         | .938  |
|                                                 | N                                       | 228   |
| Min/day in sedentary behavior (winsorized)      | Pearson Correlation                     | .031  |
|                                                 | Sig. (2-tailed)                         | .643  |
|                                                 | N                                       | 228   |
| Min/day in light PA (winsorized)                | Pearson Correlation                     | .095  |
|                                                 | Sig. (2-tailed)                         | .153  |
|                                                 | N                                       | 228   |
| Min/day in moderate-to-vigorous PA (winsorized) | Pearson Correlation                     | .110  |
|                                                 | Sig. (2-tailed)                         | .097  |
|                                                 | N                                       | 228   |

**Supplementary Material III**

FFT Individual Tasks: Descriptive Statistics

|                          | N   | Minimum | Maximum | Mean  | Std. Deviation |
|--------------------------|-----|---------|---------|-------|----------------|
| Stair walk down test     | 228 | 3.55    | 20.27   | 7.49  | 2.59           |
| Stair walk up test       | 228 | 4.19    | 15.48   | 7.87  | 1.94           |
| Chair stand test         | 227 | .00     | 21.00   | 11.20 | 2.73           |
| Arm curl test            | 228 | 6.00    | 29.00   | 14.66 | 3.65           |
| Chair sit and reach test | 228 | -12.50  | 11.00   | .44   | 3.43           |
| Back scratch test        | 228 | -18.00  | 6.00    | -2.82 | 4.66           |
| 8-ft up and go test      | 228 | 3.74    | 9.80    | 5.91  | 1.10           |
| Left leg stand test      | 228 | .18     | 30.00   | 16.35 | 11.72          |
| Right leg stand test     | 228 | .59     | 30.00   | 16.36 | 11.65          |

Supplementary Material IV

Bivariate 2-Tailed Correlations Between Key Variables from Table 1

|                      |                     | 1                  | 2                   | 3                  | 4                   | 5                   | 6                  | 7                   | 8                   | 9                  | 10                  | 11                  | 12                  | 13                  | 14                  | 15                  | 16                | 17                  | 18                 | 19                  | 20                  | 21                  | 22                 |
|----------------------|---------------------|--------------------|---------------------|--------------------|---------------------|---------------------|--------------------|---------------------|---------------------|--------------------|---------------------|---------------------|---------------------|---------------------|---------------------|---------------------|-------------------|---------------------|--------------------|---------------------|---------------------|---------------------|--------------------|
| 1. Age               | Pearson Correlation | 1                  | .073                | -.148 <sup>*</sup> | -.127               | .017                | .068               | -.105               | -.138 <sup>*</sup>  | -.129              | -.153 <sup>*</sup>  | -.055               | -.014               | .083                | .012                | -.044               | .031              | -.003               | .009               | -.075               | .036                | -.029               | -.042              |
|                      | Sig. (2-tailed)     |                    | .274                | .026               | .081                | .803                | .307               | .114                | .037                | .051               | .021                | .407                | .829                | .213                | .852                | .512                | .647              | .965                | .898               | .257                | .588                | .663                | .528               |
|                      | N                   | 228                | 228                 | 228                | 188                 | 228                 | 228                | 228                 | 228                 | 228                | 228                 | 228                 | 228                 | 228                 | 228                 | 228                 | 226               | 226                 | 226                | 228                 | 228                 | 227                 | 228                |
| 2. Sex               | Pearson Correlation | .073               | 1                   | -.086              | -.245 <sup>**</sup> | .103                | .160 <sup>*</sup>  | .014                | .093                | .300 <sup>**</sup> | .005                | .029                | -.118               | .166 <sup>*</sup>   | -.173 <sup>**</sup> | -.404 <sup>**</sup> | .009              | -.019               | .034               | -.050               | -.117               | .016                | .182 <sup>**</sup> |
|                      | Sig. (2-tailed)     | .274               |                     | .198               | .001                | .119                | .015               | .830                | .160                | .000               | .937                | .666                | .076                | .012                | .009                | .000                | .892              | .775                | .613               | .456                | .078                | .810                | .006               |
|                      | N                   | 228                | 228                 | 228                | 188                 | 228                 | 228                | 228                 | 228                 | 228                | 228                 | 228                 | 228                 | 228                 | 228                 | 226                 | 226               | 226                 | 228                | 228                 | 227                 | 228                 | 227                |
| 3. Education (years) | Pearson Correlation | -.148 <sup>*</sup> | -.086               | 1                  | .198 <sup>**</sup>  | -.155 <sup>*</sup>  | .084               | .246 <sup>**</sup>  | .225 <sup>**</sup>  | .158 <sup>*</sup>  | .261 <sup>**</sup>  | .391 <sup>**</sup>  | .064                | .001                | .152 <sup>*</sup>   | .246 <sup>**</sup>  | .074              | -.171 <sup>*</sup>  | .036               | -.144 <sup>*</sup>  | -.178 <sup>**</sup> | .034                | .021               |
|                      | Sig. (2-tailed)     | .026               | .198                |                    | .006                | .019                | .204               | .000                | .001                | .017               | .000                | .000                | .337                | .985                | .022                | .000                | .265              | .010                | .587               | .030                | .007                | .605                | .749               |
|                      | N                   | 228                | 228                 | 228                | 188                 | 228                 | 228                | 228                 | 228                 | 228                | 228                 | 228                 | 228                 | 228                 | 228                 | 226                 | 226               | 226                 | 228                | 228                 | 227                 | 228                 | 227                |
| 4. Income (low/high) | Pearson Correlation | -.127              | -.245 <sup>**</sup> | .198 <sup>**</sup> | 1                   | -.188 <sup>**</sup> | .014               | .246 <sup>**</sup>  | .156 <sup>*</sup>   | .091               | .193 <sup>**</sup>  | .136                | .075                | -.029               | .131                | .223 <sup>**</sup>  | .090              | -.161 <sup>*</sup>  | -.130              | -.084               | -.288 <sup>**</sup> | .258 <sup>**</sup>  | .086               |
|                      | Sig. (2-tailed)     | .081               | .001                | .006               |                     | .010                | .853               | .001                | .032                | .213               | .008                | .062                | .305                | .695                | .074                | .002                | .223              | .028                | .076               | .252                | .000                | .000                | .241               |
|                      | N                   | 188                | 188                 | 188                | 188                 | 188                 | 188                | 188                 | 188                 | 188                | 188                 | 188                 | 188                 | 188                 | 188                 | 186                 | 186               | 186                 | 188                | 188                 | 187                 | 188                 | 187                |
| 5. Employment        | Pearson Correlation | .017               | .103                | -.155 <sup>*</sup> | -.188 <sup>**</sup> | 1                   | .111               | -.275 <sup>**</sup> | -.246 <sup>**</sup> | -.096              | -.173 <sup>**</sup> | -.076               | -.013               | -.115               | -.172 <sup>**</sup> | -.242 <sup>**</sup> | -.042             | .135 <sup>*</sup>   | .202 <sup>**</sup> | .097                | .048                | -.205 <sup>**</sup> | -.001              |
|                      | Sig. (2-tailed)     | .803               | .119                | .019               | .010                |                     | .096               | .000                | .000                | .147               | .009                | .253                | .843                | .082                | .009                | .000                | .534              | .043                | .002               | .144                | .000                | .472                | .984               |
|                      | N                   | 228                | 228                 | 228                | 188                 | 228                 | 228                | 228                 | 228                 | 228                | 228                 | 228                 | 228                 | 228                 | 228                 | 226                 | 226               | 226                 | 228                | 228                 | 227                 | 228                 | 227                |
| 6. Adult edu.        | Pearson Correlation | .068               | .160 <sup>*</sup>   | .084               | .014                | .111                | 1                  | .060                | -.036               | .084               | -.041               | .196 <sup>**</sup>  | .036                | .001                | .009                | .025                | .024              | -.133 <sup>*</sup>  | -.095              | -.029               | -.149 <sup>*</sup>  | -.010               | -.034              |
|                      | Sig. (2-tailed)     | .307               | .015                | .204               | .853                | .096                |                    | .370                | .589                | .204               | .538                | .003                | .593                | .991                | .894                | .713                | .724              | .045                | .154               | .663                | .025                | .882                | .610               |
|                      | N                   | 228                | 228                 | 228                | 188                 | 228                 | 228                | 228                 | 228                 | 228                | 228                 | 228                 | 228                 | 228                 | 228                 | 226                 | 226               | 226                 | 228                | 228                 | 227                 | 228                 | 227                |
| 7. Comfort at comp.  | Pearson Correlation | -.105              | .014                | .246 <sup>**</sup> | .246 <sup>**</sup>  | -.275 <sup>**</sup> | .060               | 1                   | .281 <sup>**</sup>  | .257 <sup>**</sup> | .364 <sup>**</sup>  | .162 <sup>*</sup>   | .039                | .000                | .075                | .200 <sup>**</sup>  | .169 <sup>*</sup> | -.058               | -.044              | -.096               | -.229 <sup>**</sup> | .141 <sup>*</sup>   | .019               |
|                      | Sig. (2-tailed)     | .114               | .830                | .000               | .001                | .000                | .370               |                     | .000                | .000               | .000                | .014                | .557                | .999                | .259                | .003                | .141              | .389                | .512               | .149                | .001                | .033                | .779               |
|                      | N                   | 228                | 228                 | 228                | 188                 | 228                 | 228                | 228                 | 228                 | 228                | 228                 | 228                 | 228                 | 228                 | 228                 | 226                 | 226               | 226                 | 228                | 228                 | 227                 | 228                 | 227                |
| 8. Perceptual speed  | Pearson Correlation | -.138 <sup>*</sup> | .093                | .225 <sup>**</sup> | .156 <sup>*</sup>   | -.246 <sup>**</sup> | -.036              | .281 <sup>**</sup>  | 1                   | .317 <sup>**</sup> | .420 <sup>**</sup>  | .207 <sup>**</sup>  | -.129               | .166 <sup>*</sup>   | .291 <sup>**</sup>  | .149 <sup>*</sup>   | .169 <sup>*</sup> | -.099               | -.105              | -.068               | -.076               | .152 <sup>*</sup>   | .059               |
|                      | Sig. (2-tailed)     | .037               | .160                | .001               | .032                | .000                | .589               | .000                |                     | .000               | .000                | .002                | .052                | .012                | .000                | .025                | .011              | .138                | .115               | .305                | .256                | .021                | .374               |
|                      | N                   | 228                | 228                 | 228                | 188                 | 228                 | 228                | 228                 | 228                 | 228                | 228                 | 228                 | 228                 | 228                 | 228                 | 226                 | 226               | 226                 | 228                | 228                 | 227                 | 228                 | 227                |
| 9. Memory            | Pearson Correlation | -.129              | .300 <sup>**</sup>  | .158 <sup>*</sup>  | .091                | -.096               | .084               | .257 <sup>**</sup>  | .317 <sup>**</sup>  | 1                  | .468 <sup>**</sup>  | .520 <sup>**</sup>  | .091                | -.092               | -.030               | .006                | .003              | -.083               | -.107              | -.055               | -.230 <sup>**</sup> | .056                | .096               |
|                      | Sig. (2-tailed)     | .051               | .000                | .017               | .213                | .147                | .204               | .000                | .000                |                    | .000                | .000                | .173                | .165                | .656                | .932                | .962              | .213                | .106               | .412                | .000                | .397                | .147               |
|                      | N                   | 228                | 228                 | 228                | 188                 | 228                 | 228                | 228                 | 228                 | 228                | 228                 | 228                 | 228                 | 228                 | 228                 | 226                 | 226               | 226                 | 228                | 228                 | 227                 | 228                 | 227                |
| 10. Reasoning        | Pearson Correlation | -.153 <sup>*</sup> | .005                | .261 <sup>**</sup> | .193 <sup>**</sup>  | -.173 <sup>**</sup> | -.041              | .364 <sup>**</sup>  | .420 <sup>**</sup>  | .468 <sup>**</sup> | 1                   | .556 <sup>**</sup>  | .090                | .007                | .181 <sup>**</sup>  | .257 <sup>**</sup>  | .102              | -.090               | -.076              | -.034               | -.155 <sup>*</sup>  | .065                | .062               |
|                      | Sig. (2-tailed)     | .021               | .937                | .000               | .008                | .009                | .538               | .000                | .000                | .000               |                     | .000                | .177                | .921                | .006                | .000                | .128              | .177                | .254               | .608                | .019                | .332                | .355               |
|                      | N                   | 228                | 228                 | 228                | 188                 | 228                 | 228                | 228                 | 228                 | 228                | 228                 | 228                 | 228                 | 228                 | 228                 | 226                 | 226               | 226                 | 228                | 228                 | 227                 | 228                 | 227                |
| 11. Vocabulary       | Pearson Correlation | -.055              | .029                | .391 <sup>**</sup> | .136                | -.076               | .196 <sup>**</sup> | .162 <sup>*</sup>   | .207 <sup>**</sup>  | .520 <sup>**</sup> | .556 <sup>**</sup>  | 1                   | .230 <sup>**</sup>  | -.180 <sup>**</sup> | -.024               | .141 <sup>*</sup>   | .025              | -.097               | .008               | -.076               | -.193 <sup>**</sup> | .008                | .035               |
|                      | Sig. (2-tailed)     | .407               | .666                | .000               | .062                | .253                | .003               | .014                | .002                | .000               | .000                |                     | .000                | .006                | .723                | .034                | .707              | .148                | .901               | .254                | .004                | .904                | .602               |
|                      | N                   | 228                | 228                 | 228                | 188                 | 228                 | 228                | 228                 | 228                 | 228                | 228                 | 228                 | 228                 | 228                 | 228                 | 226                 | 226               | 226                 | 228                | 228                 | 227                 | 228                 | 227                |
| 12. SB               | Pearson Correlation | -.014              | -.118               | .064               | .075                | -.013               | .036               | .039                | -.129               | .091               | .090                | .230 <sup>**</sup>  | 1                   | -.554 <sup>**</sup> | -.440 <sup>**</sup> | -.136 <sup>*</sup>  | .081              | .078                | .061               | .166 <sup>*</sup>   | .003                | -.099               | .061               |
|                      | Sig. (2-tailed)     | .829               | .076                | .337               | .305                | .843                | .593               | .557                | .052                | .173               | .177                | .000                |                     | .000                | .000                | .041                | .227              | .244                | .360               | .012                | .963                | .137                | .360               |
|                      | N                   | 228                | 228                 | 228                | 188                 | 228                 | 228                | 228                 | 228                 | 228                | 228                 | 228                 | 228                 | 228                 | 228                 | 226                 | 226               | 226                 | 228                | 228                 | 227                 | 228                 | 227                |
| 13. Light PA         | Pearson Correlation | .083               | .166 <sup>*</sup>   | .001               | -.029               | -.115               | .001               | .000                | .166 <sup>*</sup>   | -.092              | .007                | -.180 <sup>**</sup> | -.554 <sup>**</sup> | 1                   | .461 <sup>**</sup>  | .175 <sup>**</sup>  | .039              | -.184 <sup>**</sup> | -.112              | -.173 <sup>**</sup> | -.037               | .091                | .062               |
|                      | Sig. (2-tailed)     | .213               | .012                | .985               | .695                | .082                | .991               | .999                | .012                | .165               | .921                | .006                | .000                |                     | .000                | .008                | .559              | .006                | .091               | .009                | .576                | .169                | .351               |
|                      | N                   | 228                | 228                 | 228                | 188                 | 228                 | 228                | 228                 | 228                 | 228                | 228                 | 228                 | 228                 | 228                 | 228                 | 226                 | 226               | 226                 | 228                | 228                 | 227                 | 228                 | 227                |
| 14. MVPA             | Pearson Correlation | .012               | -.173 <sup>**</sup> | .152 <sup>*</sup>  | .131                | -.172 <sup>**</sup> | .009               | .075                | .291 <sup>**</sup>  | -.030              | .181 <sup>**</sup>  | -.024               | -.440 <sup>**</sup> | .461 <sup>**</sup>  | 1                   | .497 <sup>**</sup>  | -.014             | -.241 <sup>**</sup> | -.145 <sup>*</sup> | -.167 <sup>*</sup>  | -.101               | .142 <sup>*</sup>   | -.072              |
|                      | Sig. (2-tailed)     | .852               | .009                | .022               | .074                | .009                | .894               | .259                | .000                | .656               | .006                | .723                | .000                | .000                |                     | .000                | .829              | .000                | .029               | .011                | .130                | .032                | .277               |
|                      | N                   | 228                | 228                 | 228                | 188                 | 228                 | 228                | 228                 | 228                 | 228                | 228                 | 228                 | 228                 | 228                 | 228                 | 226                 | 226               | 226                 | 228                | 228                 | 227                 | 228                 | 227                |
| 15. CRF              | Pearson Correlation | -.044              | -.404 <sup>**</sup> | .246 <sup>**</sup> | .223 <sup>**</sup>  | -.242 <sup>**</sup> | .025               | .200 <sup>**</sup>  | .149 <sup>*</sup>   | .006               | .257 <sup>**</sup>  | .141 <sup>*</sup>   | -.136 <sup>*</sup>  | .175 <sup>**</sup>  | .497 <sup>**</sup>  | 1                   | .028              | -.431 <sup>**</sup> | -.148 <sup>*</sup> | -.129               | -.165 <sup>*</sup>  | .203 <sup>**</sup>  | .063               |
|                      | Sig. (2-tailed)     | .512               | .000                | .000               | .002                | .000                | .713               | .003                | .025                | .932               | .000                | .034                | .041                | .008                | .000                |                     | .678              | .000                | .026               | .053                | .013                | .002                | .346               |
|                      | N                   | 226                | 226                 | 226                | 186                 | 226                 | 226                | 226                 | 226                 | 226                | 226                 | 226                 | 226                 | 226                 | 226                 | 226                 | 226               | 226                 | 226                | 226                 | 225                 | 226                 | 225                |
| 16. MAP              | Pearson Correlation | .031               | .009                | .074               | .090                | -.042               | .024               | .098                | .169 <sup>*</sup>   | .003               | .102                | .025                | .081                | .039                | -.014               | .028                | 1                 | .093                | -.048              | -.016               | -.015               | .043                | .132 <sup>*</sup>  |
|                      | Sig. (2-tailed)     | .647               | .892                | .265               | .223                | .534                | .724               | .141                | .011                | .962               | .128                | .707                | .227                | .559                | .829                | .678                |                   | .163                | -.471              | .816                | .824                | .520                | .048               |
|                      | N                   | 226                | 226                 | 226                | 186                 | 226                 | 226                | 226                 | 226                 | 226                | 226                 | 226                 | 226                 | 226                 | 226                 | 226                 | 226               | 226                 | 226                | 226                 | 225                 | 226                 | 225                |
| 17. BMI              | Pearson Correlation | -.003              | -.019               | -.171 <sup>*</sup> | -.161 <sup>*</sup>  | .135 <sup>*</sup>   | -.133 <sup>*</sup> | -.058               | -.099               | -.083              | -.090               | -.097               | .078                | -.184 <sup>**</sup> | -.241 <sup>**</sup> | -.431 <sup>**</sup> | .093              | 1                   | .257 <sup>**</sup> | .193 <sup>**</sup>  | .334 <sup>**</sup>  | -.340 <sup>**</sup> | -.044              |
|                      | Sig. (2-tailed)     | .965               | .775                | .010               | .028                | .043                | .045               | .389                | .138                | .213               | .177                | .148                | .244                | .006                | .000                | .000                | .163              |                     | .000               | .004                | .000                | .000                | .509               |
|                      | N                   | 226                | 226                 | 226                | 186                 | 226                 | 226                | 226                 | 226                 | 226                | 226                 | 226                 | 226                 | 226                 | 226                 | 226                 | 226               | 226                 | 226                | 226                 | 225                 | 226                 | 225                |
| 18. Diabetes         | Pearson Correlation | .009               | .034                | .036               | -.130               | .202 <sup>**</sup>  | -.                 |                     |                     |                    |                     |                     |                     |                     |                     |                     |                   |                     |                    |                     |                     |                     |                    |

SENSOR-BASED PHYSICAL ACTIVITY AND COGNITIVE AGING  
AZ BURZYNSKA et al.

|                           |                     |       |        |         |         |         |        |         |       |         |        |         |       |         |        |        |       |         |         |         |         |         |       |
|---------------------------|---------------------|-------|--------|---------|---------|---------|--------|---------|-------|---------|--------|---------|-------|---------|--------|--------|-------|---------|---------|---------|---------|---------|-------|
| 19. Cardiovasc. history   | Pearson Correlation | -.075 | -.050  | -.144*  | -.084   | .097    | -.029  | -.096   | -.068 | -.055   | -.034  | -.076   | .166* | -.173** | -.167* | -.129  | -.016 | .193**  | .217**  | 1       | .275**  | -.194** | .012  |
|                           | Sig. (2-tailed)     | .257  | .456   | .030    | .252    | .144    | .663   | .149    | .305  | .412    | .608   | .254    | .012  | .009    | .011   | .053   | .816  | .004    | .001    |         | .000    | .003    | .859  |
|                           | N                   | 228   | 228    | 228     | 188     | 228     | 228    | 228     | 228   | 228     | 228    | 228     | 228   | 228     | 228    | 226    | 226   | 226     | 228     | 228     | 227     | 228     | 227   |
| 20. Health rating (1-5)   | Pearson Correlation | .036  | -.117  | -.178** | -.288** | .048    | -.149* | -.229** | -.076 | -.230** | -.155* | -.193** | .003  | -.037   | -.101  | -.165* | -.015 | .334**  | .282**  | .275**  | 1       | -.386** | -.021 |
|                           | Sig. (2-tailed)     | .588  | .078   | .007    | .000    | .472    | .025   | .001    | .256  | .000    | .019   | .004    | .963  | .576    | .130   | .013   | .824  | .000    | .000    | .000    |         | .000    | .756  |
|                           | N                   | 227   | 227    | 227     | 187     | 227     | 227    | 227     | 227   | 227     | 227    | 227     | 227   | 227     | 227    | 225    | 225   | 225     | 227     | 227     | 227     | 227     | 226   |
| 21. Physical health SF-12 | Pearson Correlation | -.029 | .016   | .034    | .258**  | -.205** | -.010  | .141*   | .152* | .056    | .065   | .008    | -.099 | .091    | .142*  | .203** | .043  | -.340** | -.222** | -.194** | -.386** | 1       | .006  |
|                           | Sig. (2-tailed)     | .663  | .810   | .605    | .000    | .002    | .882   | .033    | .021  | .397    | .332   | .904    | .137  | .169    | .032   | .002   | .520  | .000    | .001    | .003    | .000    |         | .923  |
|                           | N                   | 228   | 228    | 228     | 188     | 228     | 228    | 228     | 228   | 228     | 228    | 228     | 228   | 228     | 228    | 226    | 226   | 226     | 228     | 228     | 227     | 228     | 227   |
| 22. Diabetes              | Pearson Correlation | -.042 | .182** | .021    | .086    | -.001   | -.034  | .019    | .059  | .096    | .062   | .035    | .061  | .062    | -.072  | .063   | .132* | -.044   | -.013   | .012    | -.021   | .006    | 1     |
|                           | Sig. (2-tailed)     | .528  | .006   | .749    | .241    | .984    | .610   | .779    | .374  | .147    | .355   | .602    | .360  | .351    | .277   | .346   | .048  | .509    | .851    | .859    | .756    | .923    |       |
|                           | N                   | 227   | 227    | 227     | 187     | 227     | 227    | 227     | 227   | 227     | 227    | 227     | 227   | 227     | 227    | 225    | 225   | 225     | 227     | 227     | 226     | 227     | 227   |

Variable coding: Sex: 1: Male, 2: Female; Income: 1: \$40,000; 2: >\$40,000, Employment status: 1: Working 2: Not working, Diabetes: 0: Non-diabetic, 1: Diabetic; \*p<.05, \*\*p<.01, \*\*\*p<.001
